# Supplementary figures and images for: Survival of patients with multidrug-resistant TB in Eastern Europe: what makes a difference?
Source: HighWire-hosted journal article supplement (doi:10.1136/thoraxjnl-2015-207638), 2016-03-24

Supplementary Figure 1. Kaplan-Meier survival probabilities of MDR-TB patients (10 years follow-up)

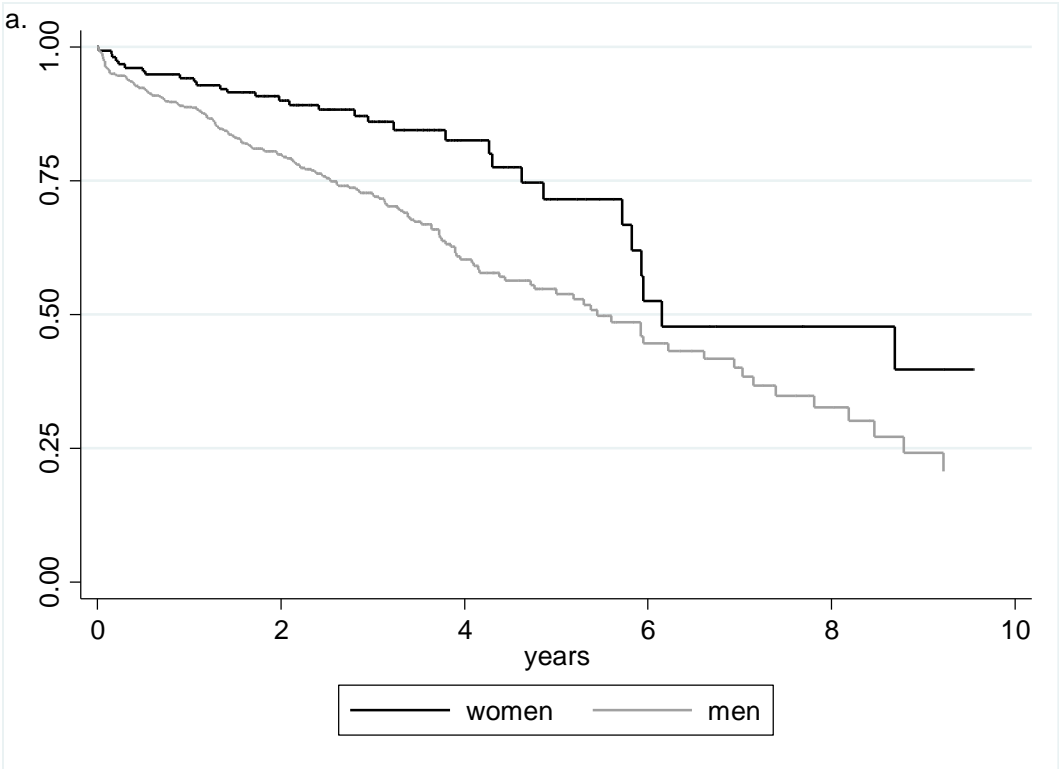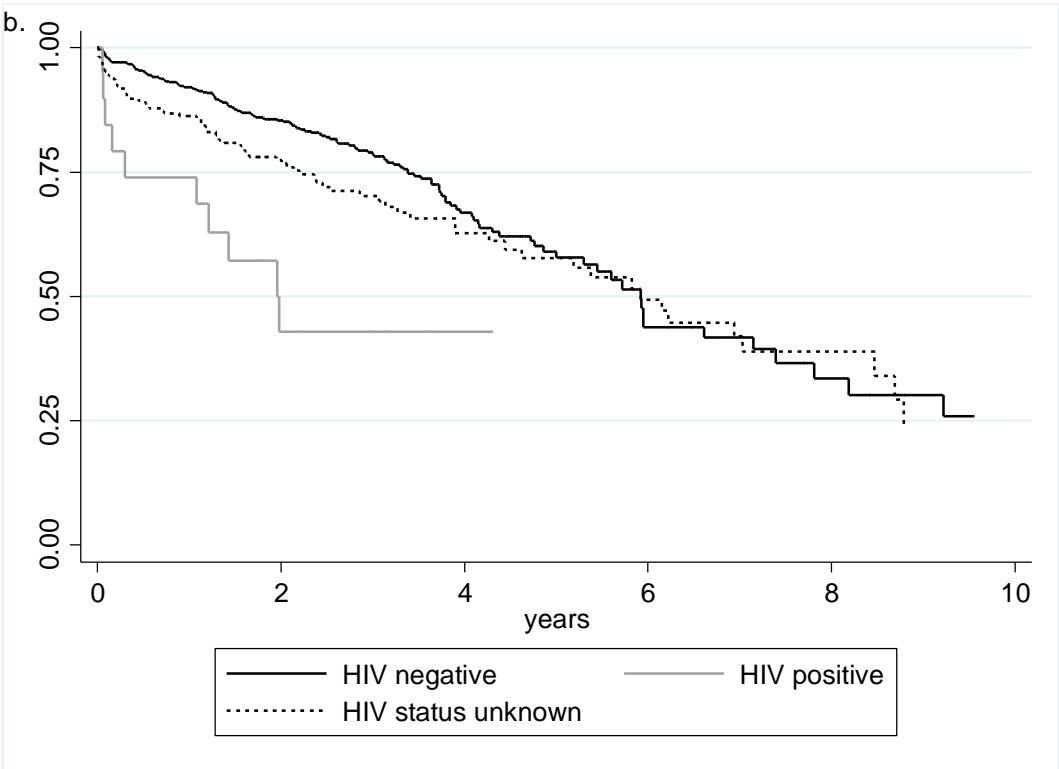

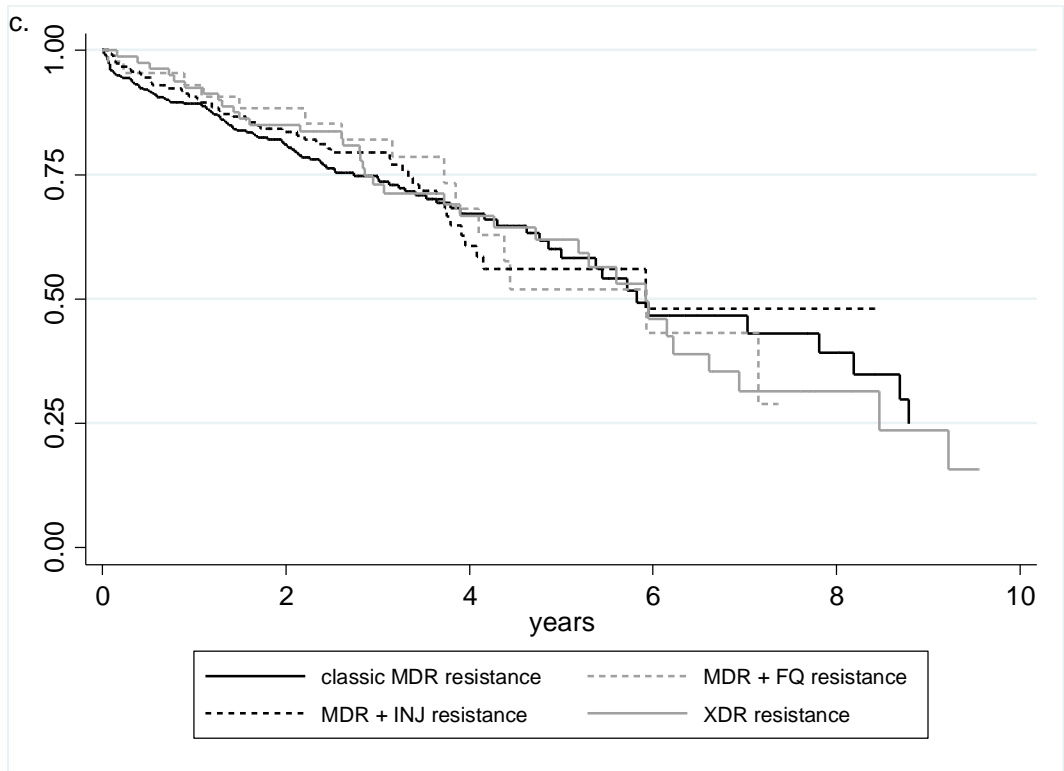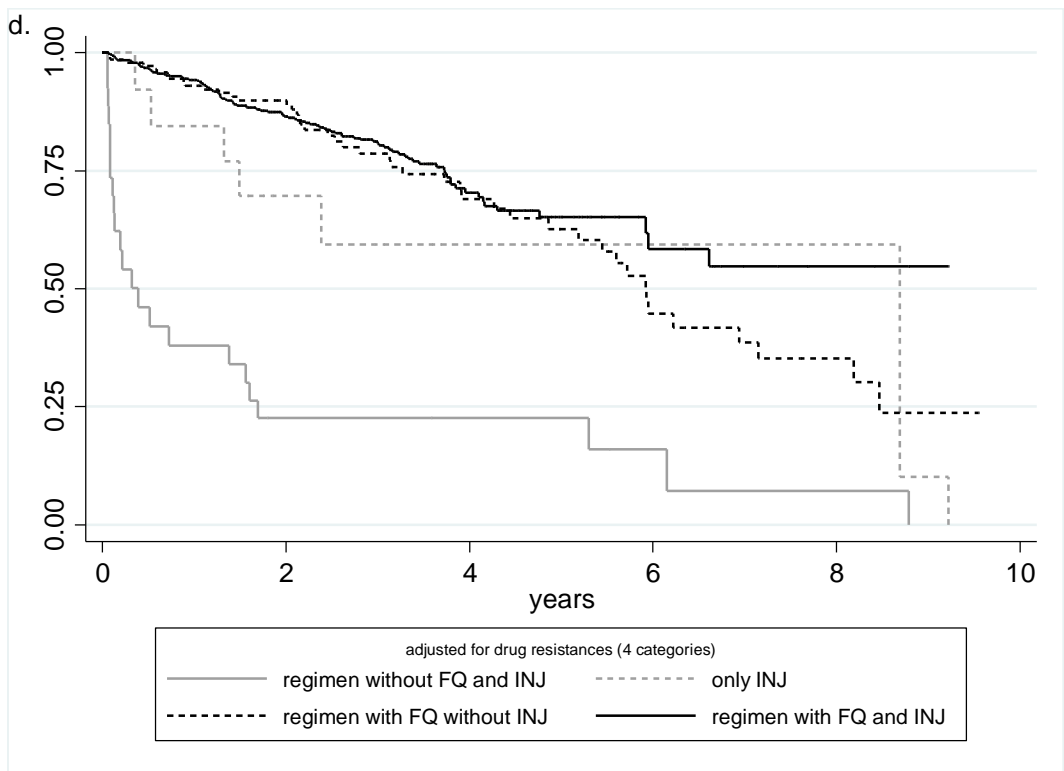

Supplement: thoraxjnl-2015-207638supp_figures.pdf [file thoraxjnl-2015-207638supp_figures.pdf]
